# Supplementary figures and images for: Homeostatic control of deep sleep and molecular correlates of sleep pressure in Drosophila
Source: eLife journal article supplement (doi:10.7554/elife.91355), 2023-10-26

**A**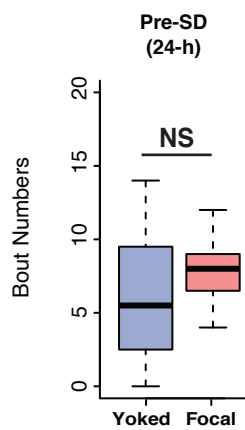**B**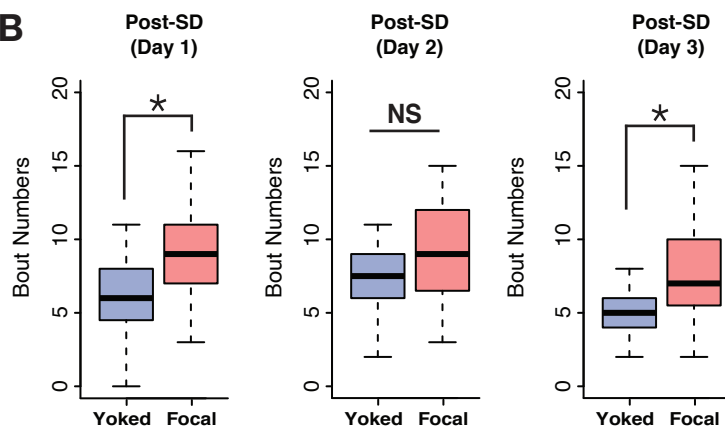**C**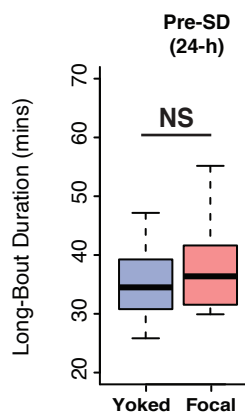**D**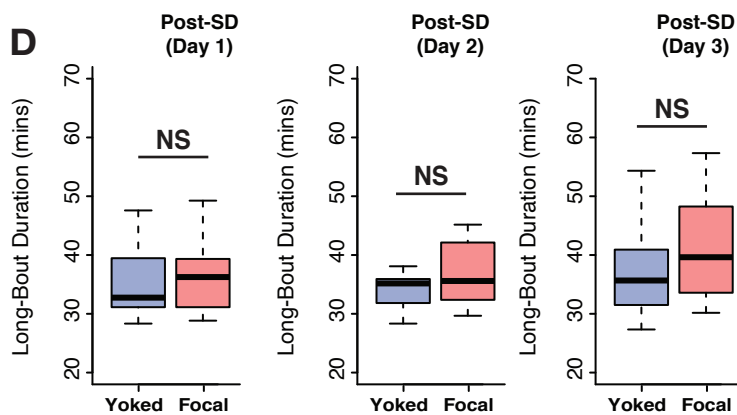

Supplement: supp [file elife-91355-supp-v1.zip]

**A**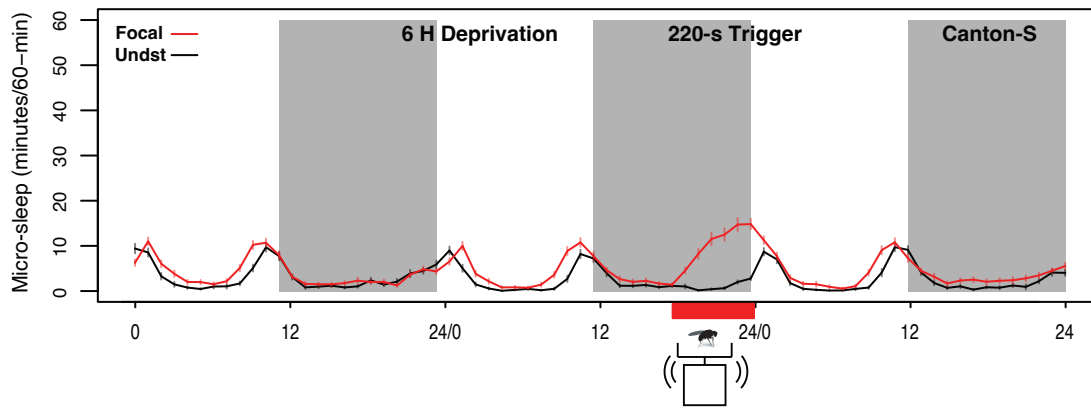**B**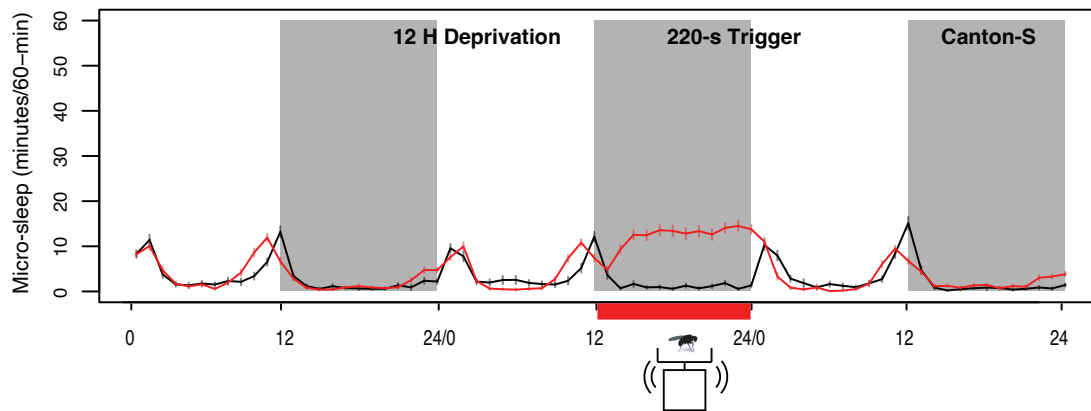**C**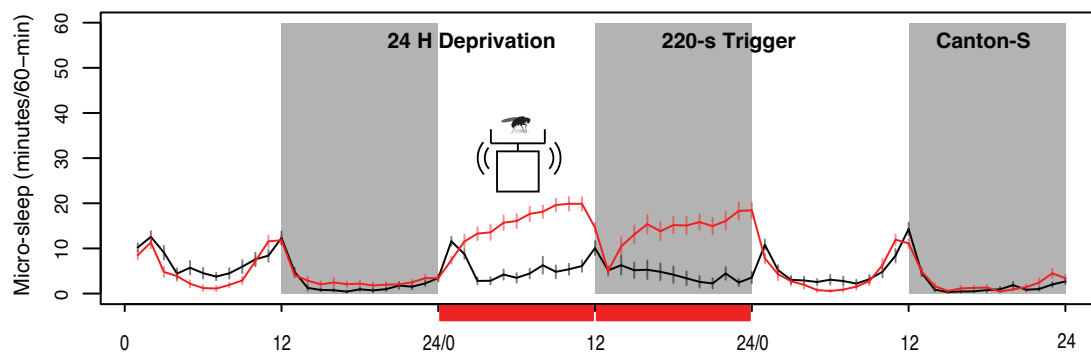

Supplement: supp [file elife-91355-supp-v1.zip]

**A**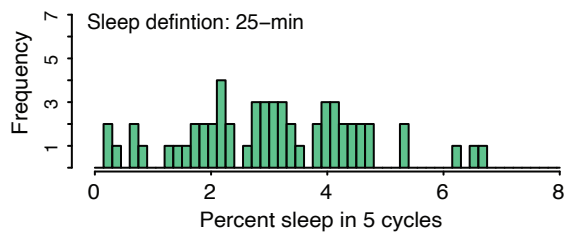**B**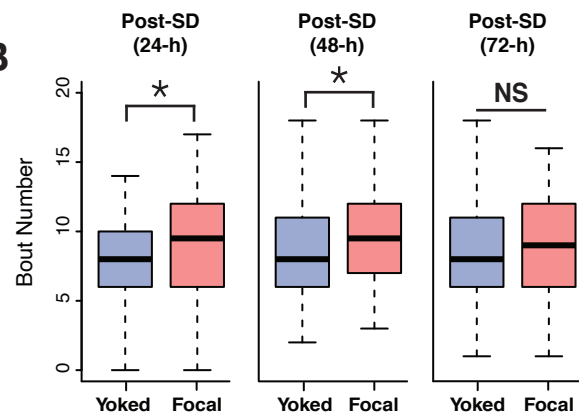**C**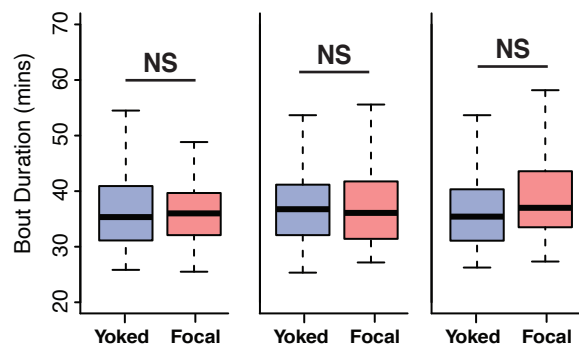

Supplement: supp [file elife-91355-supp-v1.zip]

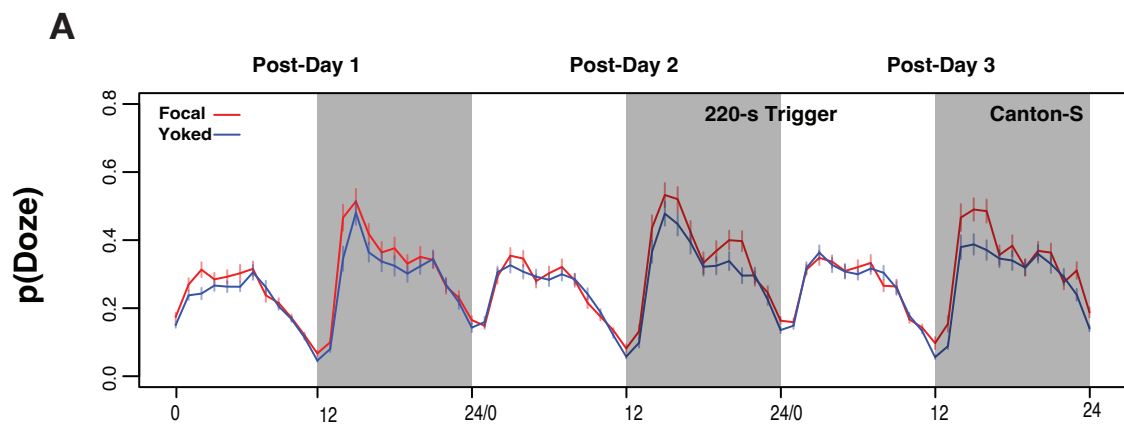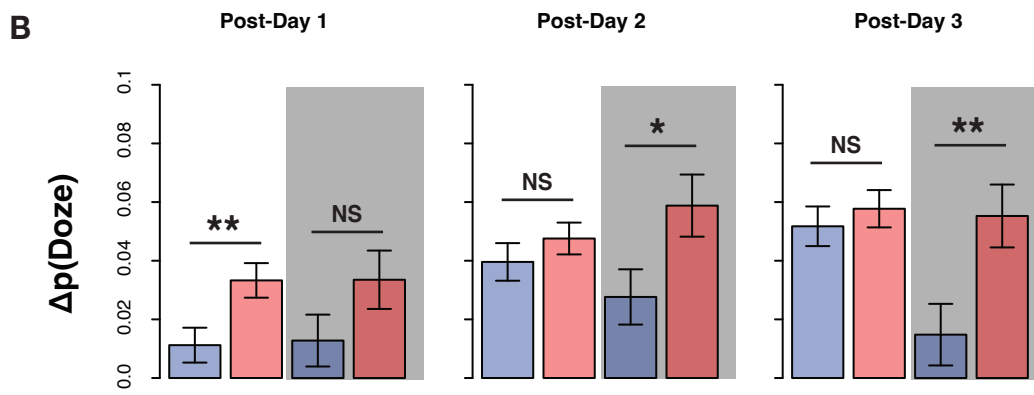

Supplement: supp [file elife-91355-supp-v1.zip]

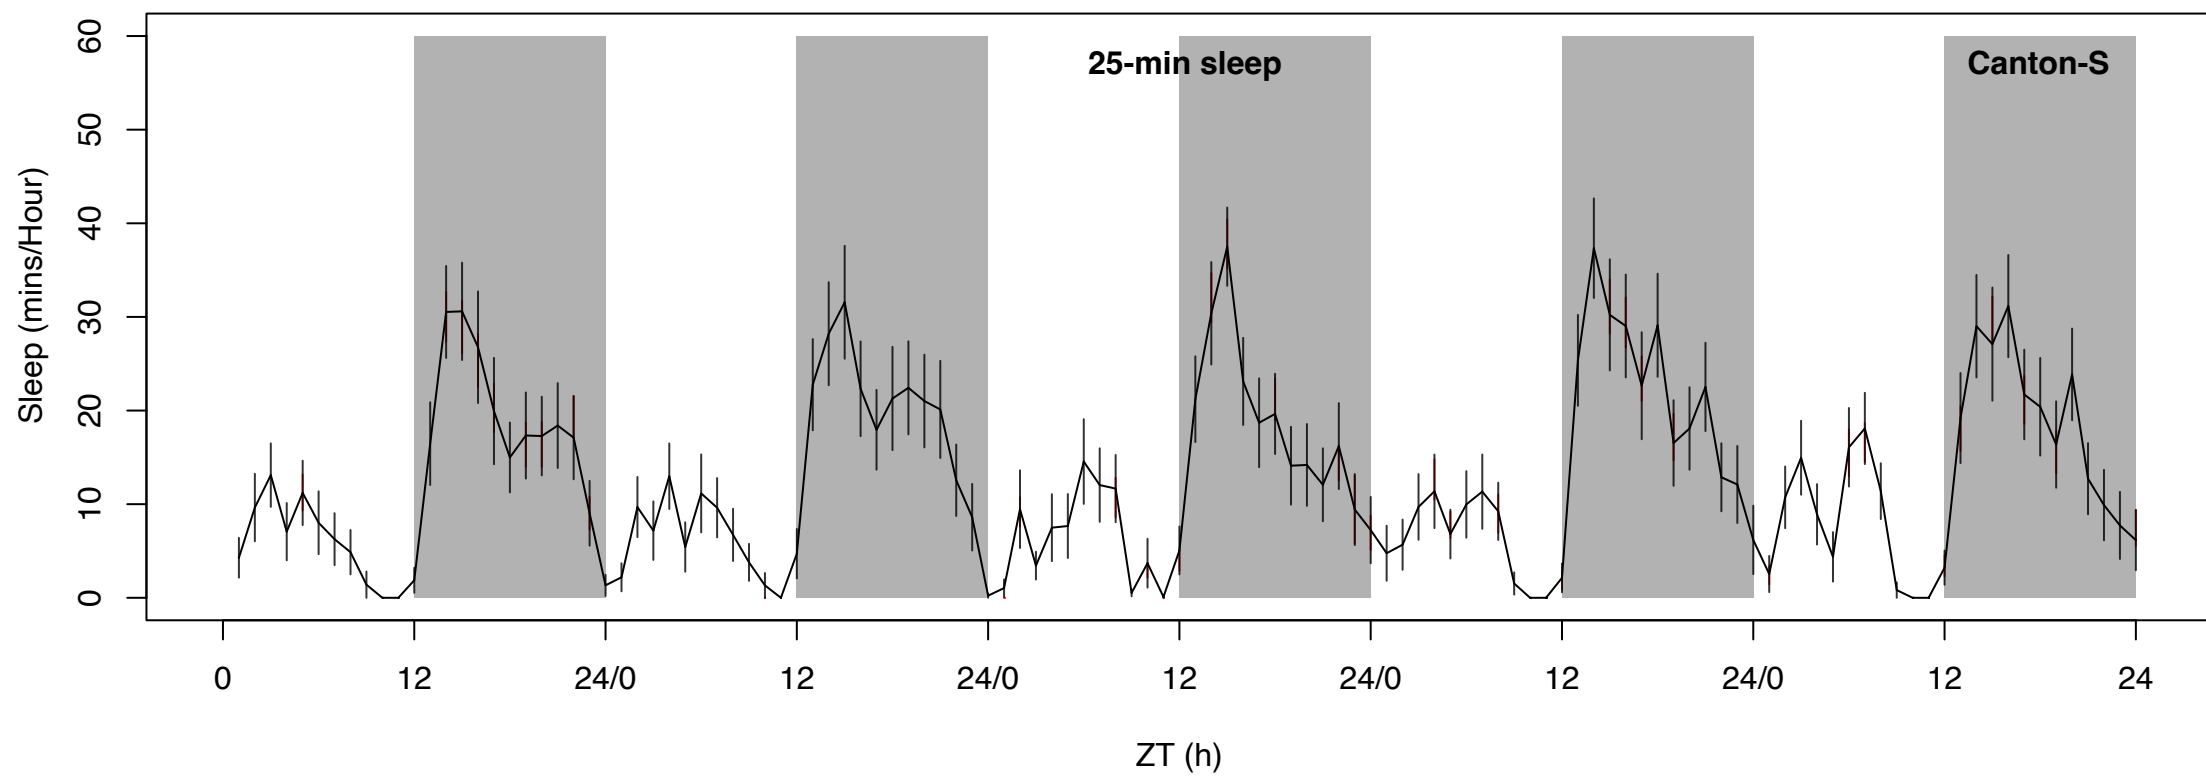

Supplement: supp [file elife-91355-supp-v1.zip]

## MALDI-TOF MS Spots

**177.07 m/z**

---

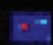

Adenosine

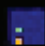

Dopamine

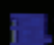

GABA

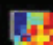

Serotonin

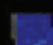

Solvent

Supplement: supp [file elife-91355-supp-v1.zip]

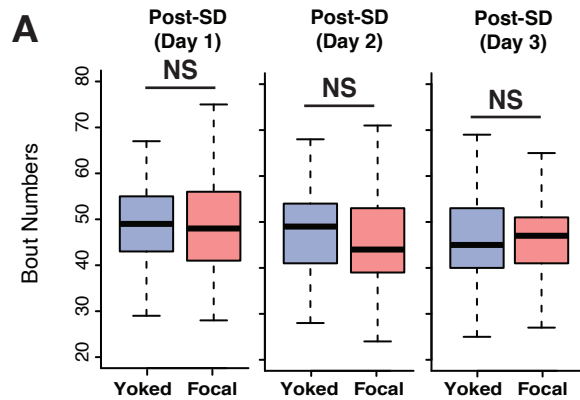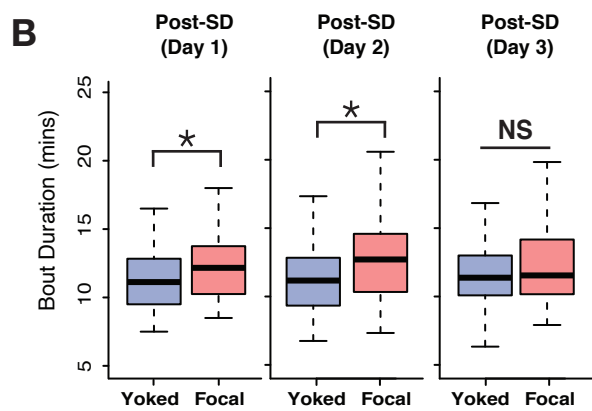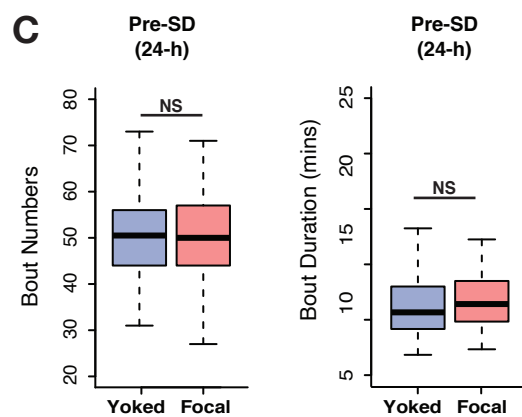

Supplement: supp [file elife-91355-supp-v1.zip]

**A**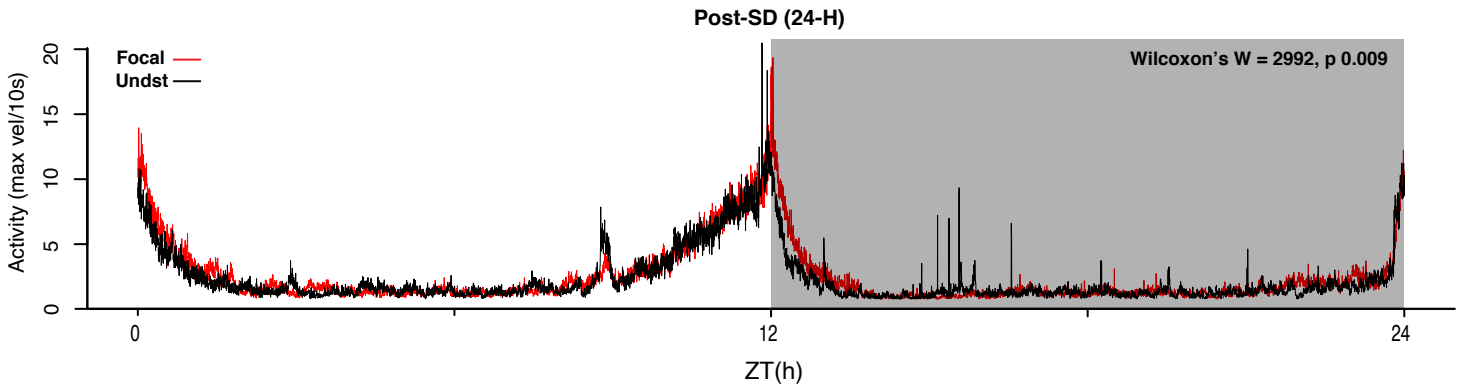**B**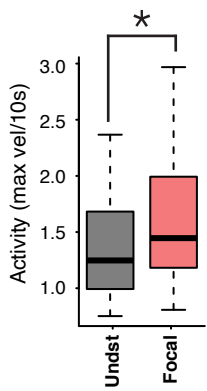**C**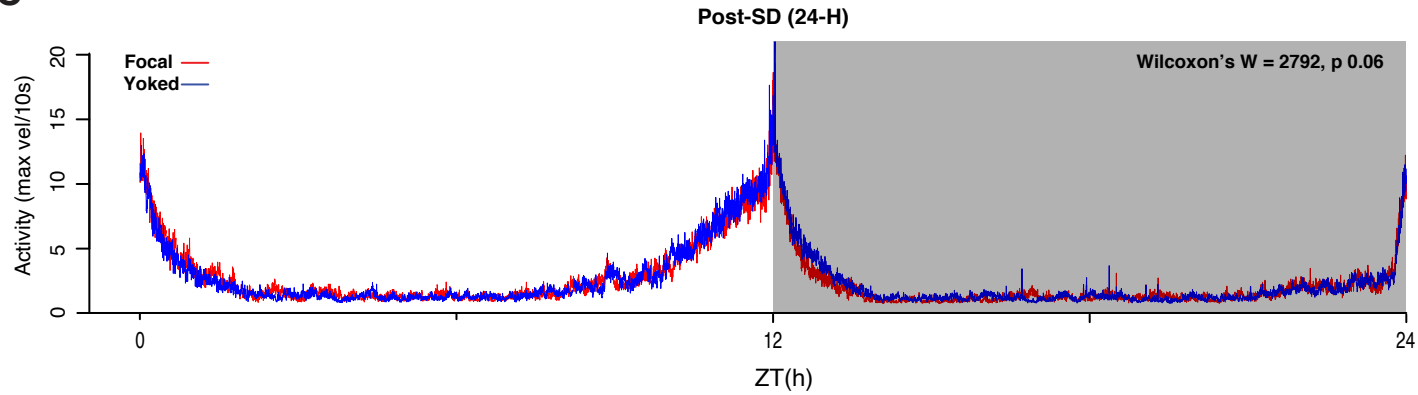**D**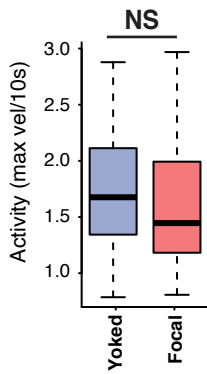

Supplement: supp [file elife-91355-supp-v1.zip]
